# Supplementary material
Source: publisher figshare collection journal article supplement (https://acs.figshare.com/ndownloader/files/26770689)
Supplement: Supplementary file 1 [file 26770689]

## Sheet: Fig4_34N
Parameters	34N	std			value	Std
r	0.661934	0.0161215		slope	4.55322	0.000944882
E	13	0.3		intercept	4.98111	0.0245254
(1-Sd)	0.83	0.02
Gain	4.29757	0.301098
<tA>	5.20756	0.0103694
<tD>	4.12	0.1
Ro	61.8123	1.72352
Ro ^6	5.57761e+10	9.33126e+09
tD	4.12	0.1
1/(r+1)	0.398292	0.00970043
r/(r+1)	0.601708	0.0207248
<tstd> fit	4.55317	0.000933512
<tstd> set	4.55317	0.011
4.916	4.999	4.9575	39mer (34mer)
f dilution	tADFRET	std	tD/(1+r)	std	<tstd>	std	<t diff>	std	Gain*ta	std	[G*ta-tD/(1+r)]	std	Ft=<tdiff>/[]	std	kt=Ft/tauD	std	{ }=R0^6/Ft	std	distance	std	std	S/N	std
0	4.91488	0.0324722	2.47904	0.0852405	4.55317	0.011	0.361709	0.000248676	22.3798	0.0549728	19.9008	0.0344721	0.0181756	3.38729e-05	0.00441156	0.000107392	3.06874e+12	5.13427e+11	120.548	3.36146	3.36146	11.1387	0.0787316
0.25	4.886	0.006	2.47904	0.0852405	4.55317	0.011	0.332833	0.000206533	22.3798	0.0549728	19.9008	0.0344721	0.0167246	3.11687e-05	0.00405937	9.88184e-05	3.33497e+12	5.57971e+11	122.231	3.40839	3.40839	55.4393	0.154133
0.5	4.816	0.006	2.47904	0.0852405	4.55317	0.011	0.262833	0.000206577	22.3798	0.0549728	19.9008	0.0344721	0.0132072	2.46134e-05	0.00320562	7.80354e-05	4.22317e+12	7.06574e+11	127.137	3.5452	3.5452	43.7796	0.123877
0.75	4.78	0.00212028	2.47904	0.0852405	4.55317	0.011	0.226833	0.000205222	22.3798	0.0549728	19.9008	0.0344721	0.0113982	2.12422e-05	0.00276655	6.73469e-05	4.89342e+12	8.18713e+11	130.297	3.63332	3.63332	106.485	0.278735
0.875	4.7725	0.00126711	2.47904	0.0852405	4.55317	0.011	0.219333	0.000205095	22.3798	0.0549728	19.9008	0.0344721	0.0110213	2.05398e-05	0.00267508	6.51202e-05	5.06075e+12	8.46708e+11	131.03	3.65373	3.65373	170.873	0.444974
1	4.75875	0.00231919	2.47904	0.0852405	4.55317	0.011	0.205583	0.000205262	22.3798	0.0549728	19.9008	0.0344721	0.0103304	1.92522e-05	0.00250738	6.10378e-05	5.39923e+12	9.03339e+11	132.451	3.69337	3.69337	88.299	0.234799
1.25	4.722	0.0101052	2.47904	0.0852405	4.55317	0.011	0.168833	0.000209604	22.3798	0.0549728	19.9008	0.0344721	0.00848373	1.58107e-05	0.00205916	5.01267e-05	6.57448e+12	1.09997e+12	136.871	3.81661	3.81661	16.704	0.057762
1.5	4.703	0.00212028	2.47904	0.0852405	4.55317	0.011	0.149833	0.000205228	22.3798	0.0549728	19.9008	0.0344721	0.007529	1.40314e-05	0.00182743	4.44856e-05	7.40818e+12	1.23945e+12	139.621	3.89332	3.89332	70.3378	0.197897
1.75	4.691	0.00684709	2.47904	0.0852405	4.55317	0.011	0.137833	0.000207155	22.3798	0.0549728	19.9008	0.0344721	0.006926	1.29076e-05	0.00168107	4.09227e-05	8.05315e+12	1.34736e+12	141.578	3.94786	3.94786	20.121	0.0643428
2	4.6895	0.00126711	2.47904	0.0852405	4.55317	0.011	0.136333	0.000205098	22.3798	0.0549728	19.9008	0.0344721	0.00685063	1.27671e-05	0.00166277	4.04774e-05	8.14175e+12	1.36219e+12	141.836	3.95507	3.95507	106.211	0.303637
4	4.63875	0.00202341	2.47904	0.0852405	4.55317	0.011	0.0855831	0.000205215	22.3798	0.0549728	19.9008	0.0344721	0.00430048	8.01457e-06	0.00104381	2.54097e-05	1.29697e+13	2.16995e+12	153.281	4.27421	4.27421	42.0805	0.144407
5.18	4.61825	0.00426887	2.47904	0.0852405	4.55317	0.011	0.0650831	0.000205879	22.3798	0.0549728	19.9008	0.0344721	0.00327037	6.09481e-06	0.00079378	1.93232e-05	1.7055e+13	2.85345e+12	160.438	4.4738	4.4738	15.2283	0.062227
7	4.605	0.00310378	2.47904	0.0852405	4.55317	0.011	0.0518331	0.000205479	22.3798	0.0549728	19.9008	0.0344721	0.00260457	4.85399e-06	0.000632177	1.53893e-05	2.14147e+13	3.58287e+12	166.642	4.64679	4.64679	16.6635	0.0781697
10	4.59625	0.00426887	2.47904	0.0852405	4.55317	0.011	0.0430831	0.000205887	22.3798	0.0549728	19.9008	0.0344721	0.00216489	4.03459e-06	0.000525459	1.27914e-05	2.5764e+13	4.31054e+12	171.858	4.79222	4.79222	10.0807	0.054786
12	4.587	0.00367244	2.47904	0.0852405	4.55317	0.011	0.0338331	0.000205666	22.3798	0.0549728	19.9008	0.0344721	0.00170009	3.16835e-06	0.000412642	1.00451e-05	3.28078e+13	5.48904e+12	178.922	4.9892	4.9892	9.19829	0.0606179
15	4.57925	0.00370508	2.47904	0.0852405	4.55317	0.011	0.0260831	0.000205679	22.3798	0.0549728	19.9008	0.0344721	0.00131065	2.44259e-06	0.00031812	7.74408e-06	4.2556e+13	7.11999e+12	186.85	5.21028	5.21028	7.02899	0.0582487
20	4.57725	0.00231919	2.47904	0.0852405	4.55317	0.011	0.0240831	0.000205281	22.3798	0.0549728	19.9008	0.0344721	0.00121016	2.2553e-06	0.000293727	7.15028e-06	4.60901e+13	7.71128e+12	189.351	5.28002	5.28002	10.3438	0.0917921
30	4.5715	0.00305161	2.47904	0.0852405	4.55317	0.011	0.0183331	0.00020547	22.3798	0.0549728	19.9008	0.0344721	0.000921222	1.71683e-06	0.000223598	5.4431e-06	6.05458e+13	1.01298e+13	198.159	5.52563	5.52563	5.9941	0.0688392
40	4.571	0.00288946	2.47904	0.0852405	4.55317	0.011	0.0178331	0.000205424	22.3798	0.0549728	19.9008	0.0344721	0.000896098	1.67001e-06	0.000217499	5.29465e-06	6.22434e+13	1.04139e+13	199.074	5.55115	5.55115	6.15623	0.0725627
100	4.55571	0.003	2.47904	0.0852405	4.55317	0.011	0.00254735	0.000205458	22.3798	0.0549728	19.9008	0.0344721	0.000128002	2.3855e-07	3.10685e-05	7.56309e-07	435743702802167	7.29038e+13	275.342	7.67785	7.67785	0.847131	0.068359
	0.359162
f	(1+f)	f/(1+f)	tADFRET	std	tADFRET(1+f)	std		Error_plot F	xi yi	x^2	calc	(diff)^2			Error_plot G	xi yi	x^2	calc	diff
0	1	0	4.91488	0.0324722	4.91488	0.0324722			0	0	4.93984	0.000623036	n	20		0	0	4.98111	0.00438756	n	20
0.25	1.25	0.2	4.886	0.006	6.1075	0.0075			0.9772	0.04	4.86366	0.000499037	numerator	-11.9888		1.52687	0.0625	6.11942	0.000142078	numerator	935460
0.5	1.5	0.333333	4.816	0.006	7.224	0.009			1.60533	0.111111	4.81288	9.7537e-06	denominator	31.4767		3.612	0.25	7.25772	0.00113734	denominator	205450
0.75	1.75	0.428571	4.78	0.00212028	8.365	0.00371049			2.04857	0.183673	4.7766	1.1542e-05	m slope	-0.38088		6.27375	0.5625	8.39603	0.000962823	m slope	4.55322
0.875	1.875	0.466667	4.7725	0.00126711	8.94844	0.00237583			2.22717	0.217778	4.76209	0.000108307	b intercept	4.93984		7.82988	0.765625	8.96518	0.000280372	b intercept	4.98111
1	2	0.5	4.75875	0.00231919	9.5175	0.00463839			2.37938	0.25	4.7494	8.74793e-05	S	0.00942969		9.5175	1	9.53433	0.000283392	S	0.095767
1.25	2.25	0.555556	4.722	0.0101052	10.6245	0.0227366			2.62333	0.308642	4.72824	3.88999e-05	(nSx^2)-(Sx)^2	31.4767		13.2806	1.5625	10.6726	0.00231737	(nSx^2)-(Sx)^2	205450
1.5	2.5	0.6	4.703	0.00212028	11.7575	0.00530071			2.8218	0.36	4.71131	6.90394e-05	m error	0.00751655		17.6363	2.25	11.8109	0.00285626	m error	0.000944882
1.75	2.75	0.636364	4.691	0.00684709	12.9002	0.0188295			2.98518	0.404959	4.69746	4.17164e-05	b error	0.00551375		22.5754	3.0625	12.9492	0.00240089	b error	0.0245254
2	3	0.666667	4.6895	0.00126711	14.0685	0.00380133			3.12633	0.444444	4.68592	1.28378e-05				28.137	4	14.0876	0.000363043
4	5	0.8	4.63875	0.00202341	23.1938	0.0101171			3.711	0.64	4.63513	1.30822e-05				92.775	16	23.194	5.88386e-08
5.18	6.18	0.838188	4.61825	0.00426887	28.5408	0.0263816			3.87096	0.702559	4.62059	5.46691e-06				147.841	26.8324	28.5668	0.000676338
7	8	0.875	4.605	0.00310378	36.84	0.0248302			4.02937	0.765625	4.60657	2.45576e-06				257.88	49	36.8537	0.000186347
10	11	0.909091	4.59625	0.00426887	50.5588	0.0469575			4.17841	0.826446	4.59358	7.11527e-06				505.588	100	50.5133	0.00206487
12	13	0.923077	4.587	0.00367244	59.631	0.0477417			4.23415	0.852071	4.58826	1.57644e-06				715.572	144	59.6197	0.000126606
15	16	0.9375	4.57925	0.00370508	73.268	0.0592813			4.29305	0.878906	4.58276	1.23349e-05				1099.02	225	73.2794	0.000130106
20	21	0.952381	4.57725	0.00231919	96.1222	0.0487031			4.35929	0.907029	4.57709	2.42564e-08				1922.44	400	96.0455	0.00589001
30	31	0.967742	4.5715	0.00305161	141.716	0.0945998			4.42403	0.936524	4.57124	6.57567e-08				4251.49	900	141.578	0.019266
40	41	0.97561	4.571	0.00288946	187.411	0.118468			4.45951	0.951814	4.56825	7.57969e-06				7496.44	1600	187.11	0.0906658
100	101	0.990099	4.55571	0.003	460.127	0.303			4.51061	0.980296	4.56273	4.91952e-05				46012.7	10000	460.303	0.0309464
253.055	273.055	13.5558	93.6336	0.102821	1251.84	0.890445		S	62.8647	10.7619	93.6336	0.00160054			S	62612.2	13474.3	1251.84	0.165084

## Sheet: Lifetime_dilution_34N
fits	34N	34N	34N	c2	c2	c2		fits	c2	dil 0.25	c2	dil 0.5	c2	dil 0.75	c2	dil 0.875	chi2	dil 1	chi2	dil 1.25	chi2	dil 1.5	chi2	dil 1.75	chi2	dil 2
set1	4.906	4.91	4.917	0.996	1.012	1.089		set 1	1.04	4.89	1.04	4.823	1.058	4.779	1.06	4.771	1.051	4.762	0.947	4.717	1.009	4.7	1.024	4.7	1.031	4.688
set2	4.907	4.898	4.915	1.011	0.995	1.081		set 2	1.04	4.882	1.026	4.816	1.085	4.78	1.048	4.774	1.075	4.757	1.062	4.729	1.025	4.705	1.03	4.685	1.038	4.691
set3	4.901	4.909	4.917	1.007	0.968	1.048		set 3	1.00857	4.883	1.00857	4.809	1.029	4.783	1.08	4.773	1.049	4.757	1.011	4.71	1.42	4.704	1.053	4.693	1.051	4.69
set4	4.897	4.901	4.915	0.978	0.989	1.066		set 4	1.011	4.889	1.037	4.822	1.065	4.778	1.075	4.772	1.042	4.759	1.119	4.732	1.04	4.703	1	4.686	1.081	4.689
set5	4.898	4.911	4.924	0.979	0.99	1.058		average	1.02489	4.886	1.02789	4.8175	1.05925	4.78	1.06575	4.7725	1.05425	4.75875	1.03475	4.722	1.1235	4.703	1.02675	4.691	1.05025	4.6895
set6	4.896	4.896	4.926	1.034	0.985	1.041		std	0.0174724	0.00408248	0.0142176	0.00645497	0.0231858	0.00216025	0.0145688	0.00129099	0.0143614	0.00236291	0.0732683	0.0102956	0.198072	0.00216025	0.0217773	0.00697615	0.0221115	0.00129099
set7	4.899	4.892	4.925	0.995	1.025	1.055
set8	4.9	4.891	4.929	0.988	0.975	0.941		fits	c2	dil 4	c2	dil 5.18	c2	dil 7.5	c2	dil 10	c2	dil 12	c2	dil 15	c2	dil 20	c2	dil 30	c2	dil 40
set9	4.896	4.888	4.983	0.984	0.991	1.083		set 1	1.016	4.639	1.049	4.614	1.05	4.606	1.049	4.594	1.022	4.592	1.036	4.574	1.05	4.579	1.038	4.569	1.038	4.568
set10	4.913	4.899	5.007	1.003	0.981	1.079		set 2	1.038	4.636	1.058	4.616	1.035	4.609	1.064	4.602	1.064	4.583	1.031	4.582	1.02	4.579	1.026	4.57	1.047	4.574
set11	4.9	4.9	5.011	0.975	0.995	1.069		set 3	1.038	4.639	1.061	4.619	1.032	4.603	1.013	4.592	1.043	4.587	1.049	4.579	1.054	4.577	1.022	4.576	1.029	4.569
set12	4.903	4.898	5.013	1.005	1.003	1.087		set 4	1.022	4.641	1.054	4.624	1.039	4.602	1.039	4.597	1.016	4.586	1.072	4.582	1.036	4.574	1.057	4.571	1.047	4.573
set13	4.887	4.906	4.996	0.982	1.011	1.06		average	1.0285	4.63875	1.0555	4.61825	1.039	4.605	1.04125	4.59625	1.03625	4.587	1.047	4.57925	1.04	4.57725	1.03575	4.5715	1.04025	4.571
set14	4.901	4.904	4.997	0.985	0.982	1.071		std	0.0112398	0.00206155	0.00519615	0.00434933	0.00787401	0.00316228	0.0214534	0.00434933	0.0218232	0.00374166	0.0183121	0.00377492	0.0154056	0.00236291	0.0157136	0.00310913	0.00861684	0.00294392
set15	4.88	4.899	5.002	0.986	0.984	1.061
set16	4.894	4.902	5	1.012	0.994	1.065			dilution	Lifetime	std
set17	4.905	4.9	4.917	1.018	0.997	1.089			0	4.91488	0.0324722
set18	4.892	4.896	4.915	1	0.97	1.081			0.25	4.886	0.00408248
set19	4.89	4.897	4.917	0.999	0.991	1.048			0.5	4.8175	0.00645497
set20	4.905	4.895	4.915	1.001	0.978	1.066			0.75	4.78	0.00216025
set21	4.899	4.893	4.924	0.996	1.031	1.058			0.875	4.7725	0.00129099
set22	4.898	4.881	4.926	0.99	0.978	1.041			1	4.75875	0.00236291
set23	4.903	4.896	4.925	1.013	0.991	1.055			1.25	4.722	0.0102956
set24	4.897	4.904	4.929	0.992	0.993	0.941			1.5	4.703	0.00216025
set25	4.899	4.891	4.94771	1.01	0.982	1.05554			1.75	4.691	0.00697615
average	4.91488			1.01491					2	4.6895	0.00129099
std	0.0324722			0.0379057					4	4.63875	0.00206155
									5.18	4.61825	0.00434933
fits	std mixt.	std mixt.	c2	c2					7	4.605	0.00316228
set1	4.56	4.555	1.029	1.029					10	4.59625	0.00434933
set2	4.565	4.557	1.035	0.995					12	4.587	0.00374166
set3	4.532	4.558	0.994	1.015					15	4.57925	0.00377492
set4	4.555	4.563	1.029	1.032					20	4.57725	0.00236291
set5	4.557	4.525	0.995	1.033					30	4.5715	0.00310913
set6	4.558	4.56	1.015	1.029					40	4.571	0.00294392
set7	4.563	4.565	1.032	1.035					100	4.55265	0.0106369
set8	4.558	4.542	1.031	0.994
set9	4.556	4.575	1.018	1.017
set10	4.558		0.998
set11	4.557		1.021
set12	4.543		1.006
set13	4.543		1.011
set14	4.541		1.023
set15	4.55		1.023
set16	4.548		1.019
set17	4.553		0.998
set18	4.555		1.007
set19	4.555		0.971
set20	4.533		1.071
set21	4.539		0.997
set22	4.55		1.015
set23	4.547		1.001
set24	4.55		1.005
set25	4.564		1.031
average	4.55265		1.01629
std	0.0106369		0.0184613
